# Supplementary material for: Mechanisms in the Catalytic Reduction of N2O by CO over the M13@Cu42 Clusters of Aromatic-like Inorganic and Metal Compounds
Source: Molecules. 2023 Jun 1;28(11):4485. doi: 10.3390/molecules28114485 (PMC10254853; doi:10.3390/molecules28114485)
Supplement: Supplementary file 1 [file molecules-28-04485-s001.zip › molecules-2403720-supplementary.pdf]

## *Support Information*

# **Mechanisms in the Catalytic Reduction of N<sub>2</sub>O by CO over the M<sub>13</sub>@Cu<sub>42</sub> Clusters of Aromatic-Like Inorganic and Metal Compounds**

### **Table of Contents**

**Figure S1.** The initial and final structures of N<sub>2</sub>O adsorption on Cu<sub>55</sub> cluster systems.

**Figure S2.** Potential energy profiles, the optimized intermediates and transition states for N<sub>2</sub>O decomposition to N<sub>2</sub> on the Co<sub>13</sub>@Cu<sub>42</sub> cluster.

**Figure S3.** Potential energy profiles, the optimized intermediates and transition states for N<sub>2</sub>O decomposition to N<sub>2</sub> on the Zn<sub>13</sub>@Cu<sub>42</sub> cluster.

**Figure S4.** Potential energy profiles, the optimized intermediates and transition states for N<sub>2</sub>O decomposition to N<sub>2</sub> on the Ru<sub>13</sub>@Cu<sub>42</sub> cluster.

**Figure S5.** Potential energy profiles, the optimized intermediates and transition states for N<sub>2</sub>O decomposition to N<sub>2</sub> on the Rh<sub>13</sub>@Cu<sub>42</sub> cluster.

**Figure S6.** Potential energy profiles, the optimized intermediates and transition states for N<sub>2</sub>O decomposition to N<sub>2</sub> on the Pd<sub>13</sub>@Cu<sub>42</sub> cluster.

**Figure S7.** Potential energy profiles, the optimized intermediates and transition states for N<sub>2</sub>O decomposition to N<sub>2</sub> on the Pt<sub>13</sub>@Cu<sub>42</sub> cluster.

**Figure S8.** Local density of states (LDOS) of M<sub>13</sub>@Cu<sub>42</sub> clusters (M = Cu, Co, Ni, Zn, Ru, Rh, Pd, Pt).

**Table S1.** Adsorption energies of different adsorption modes (N, O) and different adsorption sites for N<sub>2</sub>O on Cu<sub>55</sub> cluster ( $\Delta E_{ads}$ ), charge transfer between the molecule and cluster (CT).

**Table S2.** The molecular energies, Zero-point energy (ZPE), entropic corrections (TΔS) at T = 298.15 K to the free energies and (ZPE-TΔS) values of the gas-phase.

**Table S3.** The free energies of the adsorbed species at T = 298.15 K.

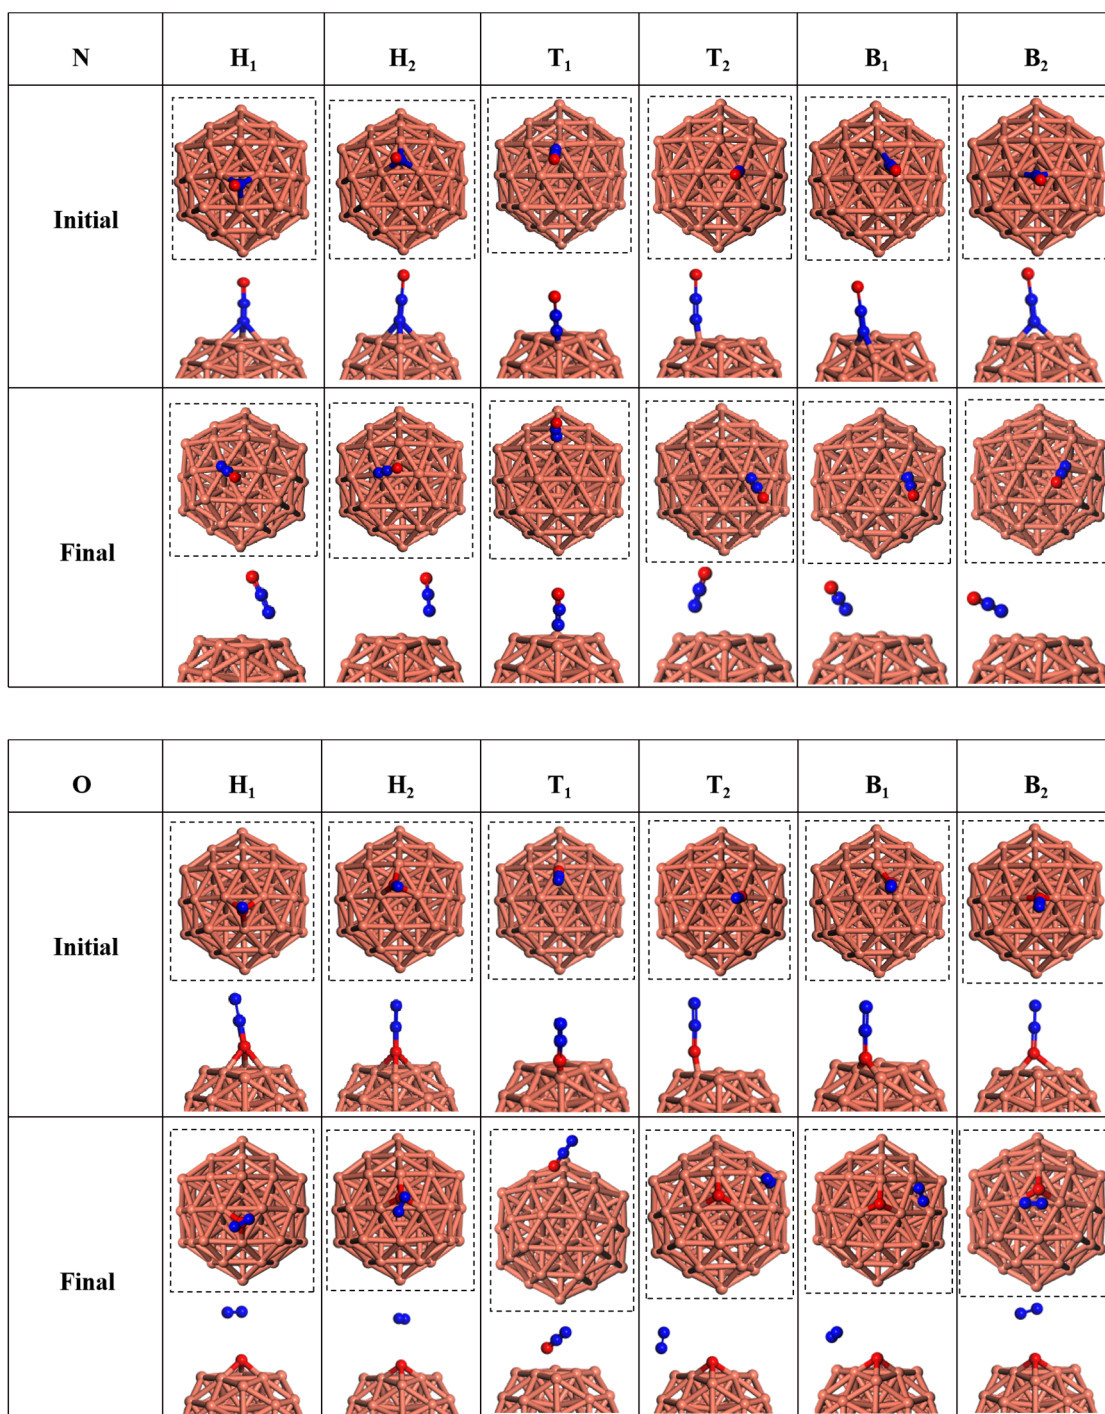

**Figure S1.** The initial and final structures of N<sub>2</sub>O adsorption on Cu<sub>55</sub> cluster systems. The left superscript “N” or “O” indicates the N terminal or O terminal manners in N<sub>2</sub>O adsorption.

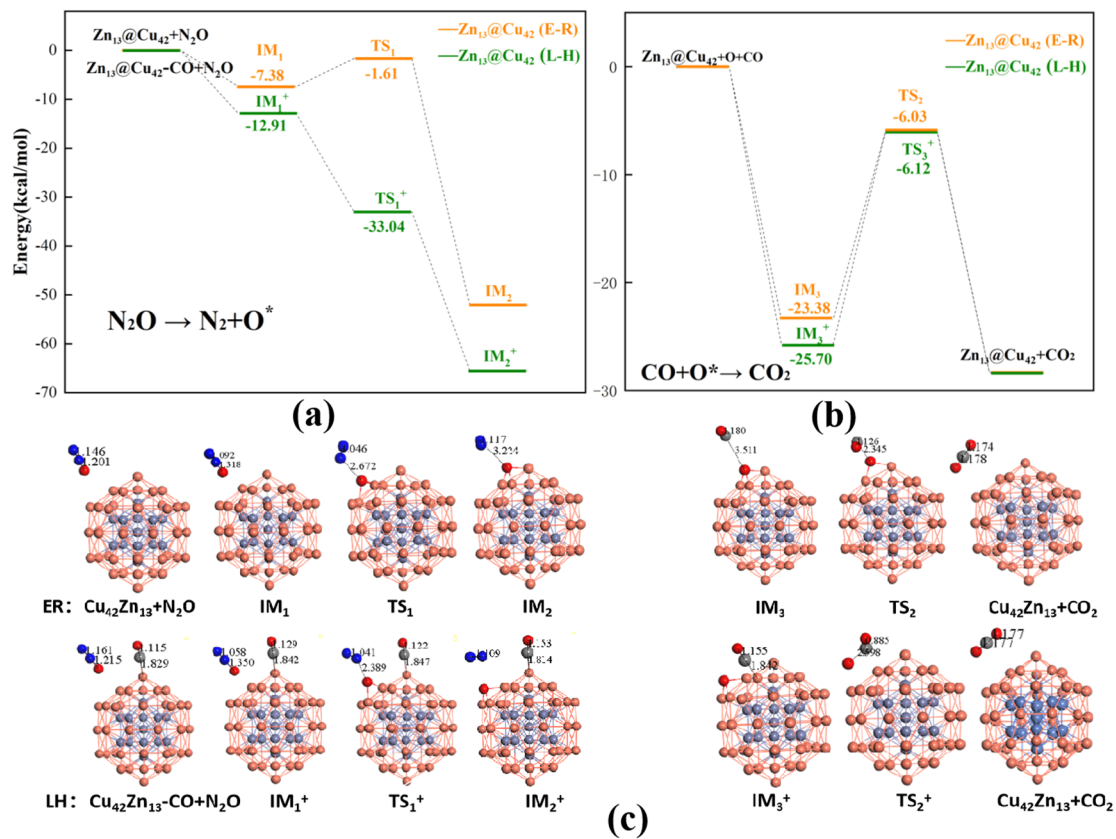

**Figure S2.** (a) and (b) Potential energy profiles for  $\text{N}_2\text{O}$  decomposition to  $\text{N}_2$  on the  $\text{Co}_{13}@\text{Cu}_{42}$  cluster. (c) Corresponding optimized intermediates and transition states involved in CO oxidation on the  $\text{Co}_{13}@\text{Cu}_{42}$  cluster.



**Figure S3.** (a) and (b) Potential energy profiles for  $\text{N}_2\text{O}$  decomposition to  $\text{N}_2$  on the  $\text{Zn}_{13}@Cu_{42}$  cluster. (c) Corresponding optimized intermediates and transition states involved in  $\text{CO}$  oxidation on the  $\text{Zn}_{13}@Cu_{42}$  cluster.

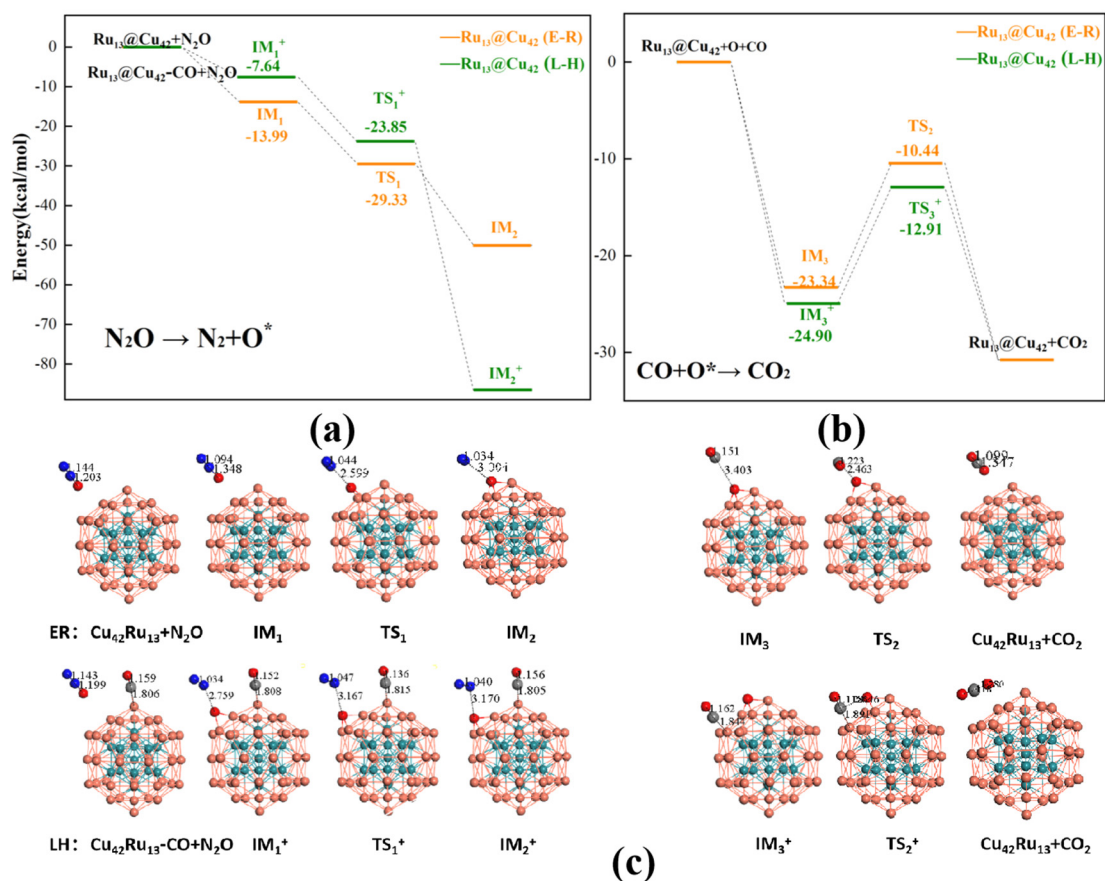

**Figure S4.** (a) and (b) Potential energy profiles for  $\text{N}_2\text{O}$  decomposition to  $\text{N}_2$  on the  $\text{Ru}_{13}@\text{Cu}_{42}$  cluster. (c) Corresponding optimized intermediates and transition states involved in  $\text{CO}$  oxidation on the  $\text{Ru}_{13}@\text{Cu}_{42}$  cluster.

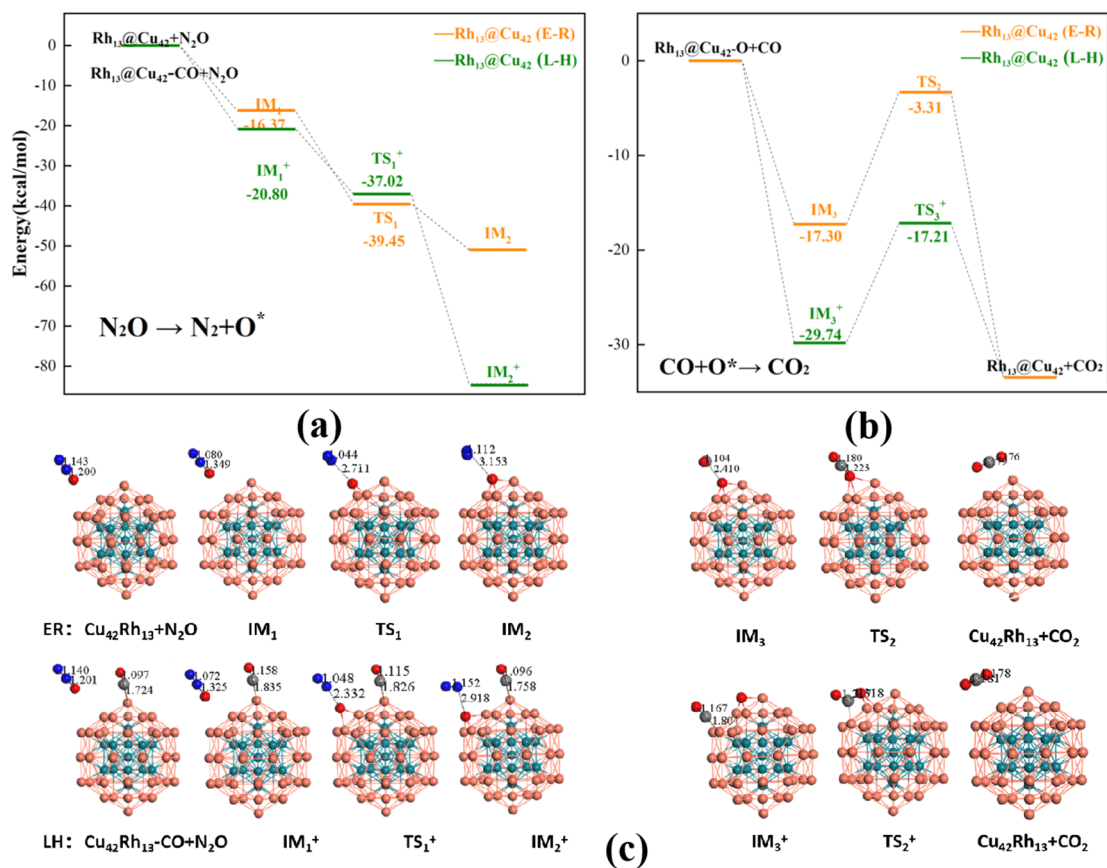

**Figure S5.** (a) and (b) Potential energy profiles for  $\text{N}_2\text{O}$  decomposition to  $\text{N}_2$  on the  $\text{Rh}_{13}@Cu_{42}$  cluster. (c) Corresponding optimized intermediates and transition states involved in  $\text{CO}$  oxidation on the  $\text{Rh}_{13}@Cu_{42}$  cluster.

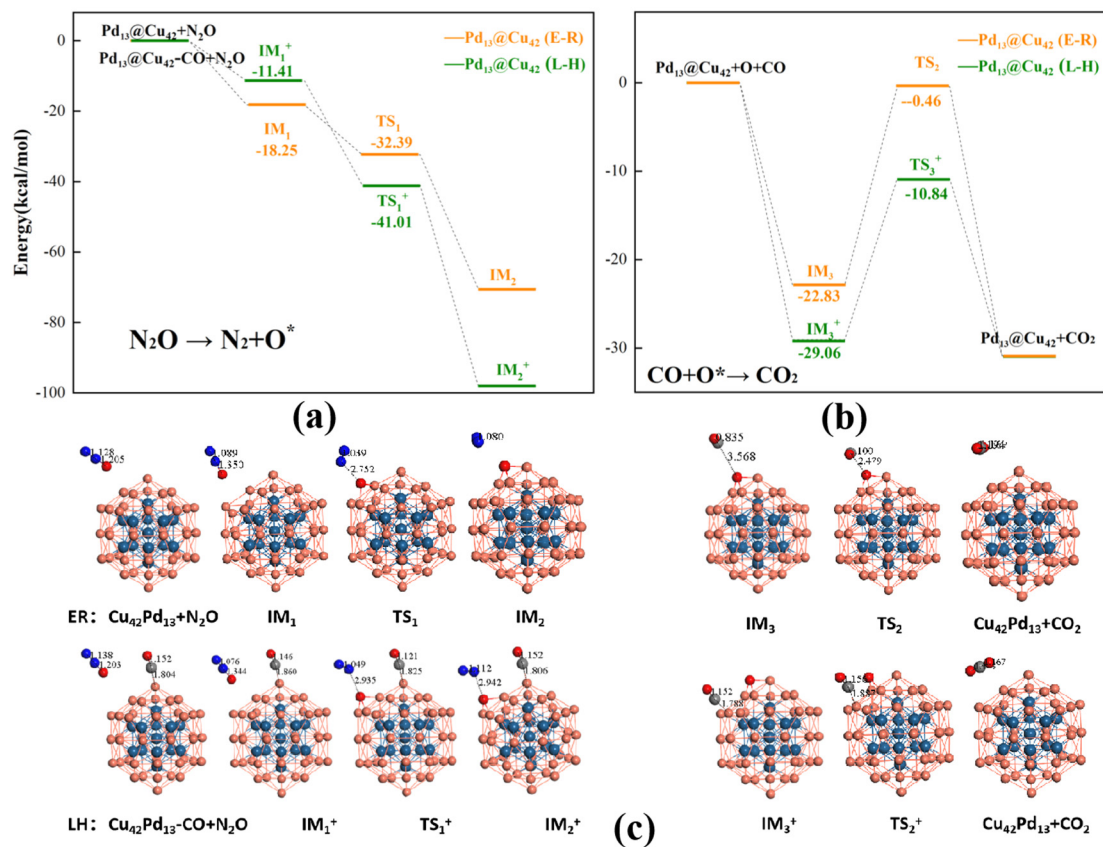

**Figure S6.** (a) and (b) Potential energy profiles for  $\text{N}_2\text{O}$  decomposition to  $\text{N}_2$  on the  $\text{Pd}_{13}@\text{Cu}_{42}$  cluster. (c) Corresponding optimized intermediates and transition states involved in  $\text{CO}$  oxidation on the  $\text{Pd}_{13}@\text{Cu}_{42}$  cluster.

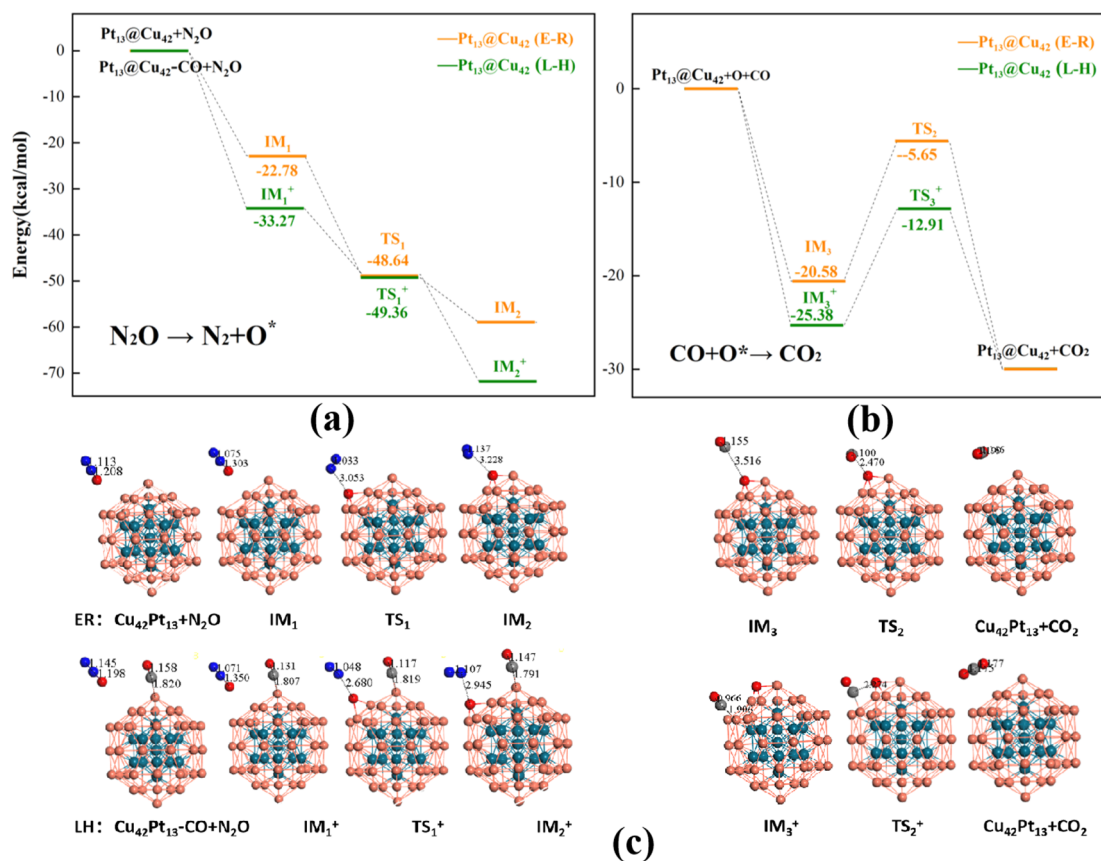

**Figure S7.** (a) and (b) Potential energy profiles for  $\text{N}_2\text{O}$  decomposition to  $\text{N}_2$  on the  $\text{Pt}_{13}@\text{Cu}_{42}$  cluster. (c) Corresponding optimized intermediates and transition states involved in  $\text{CO}$  oxidation on the  $\text{Pt}_{13}@\text{Cu}_{42}$  cluster.

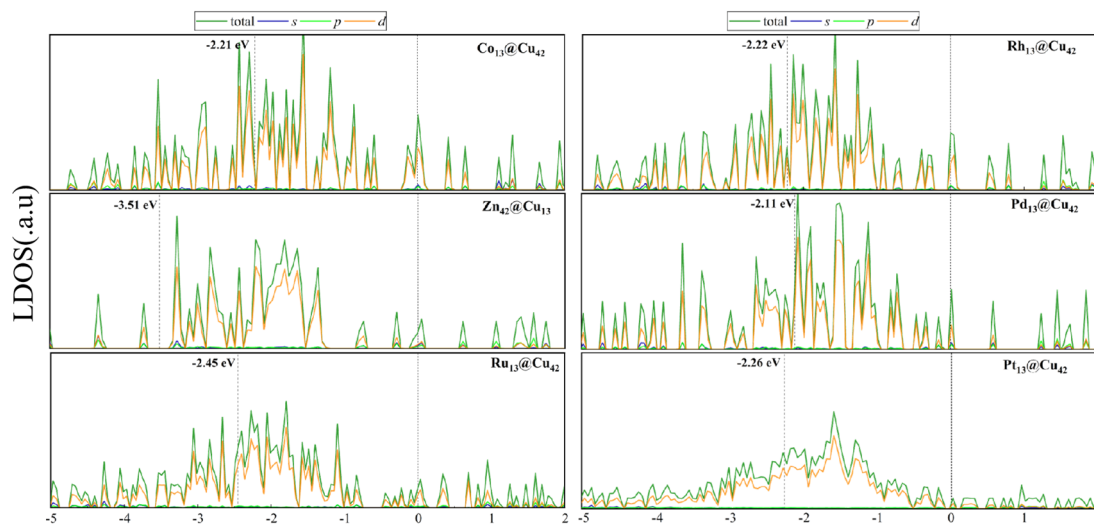

**Figure S8.** Local density of states (LDOS) of various  $M_{13}@Cu_{42}$  clusters ( $M = Cu, Co, Ni, Zn, Ru, Rh, Pd, Pt$ ). For each system, the HOMO level marked by the black dashed line is shifted to zero, and the red dashed lines and the numbers next to them indicate the d band center.

**Table S1.** Adsorption energies of different adsorption modes (N, O) and different adsorption sites for N<sub>2</sub>O on Cu<sub>55</sub> cluster ( $\Delta E_{ads}$ ), charge transfer between the molecule and cluster (CT).

|   | Property              | H <sub>1</sub> | H <sub>2</sub> | B <sub>1</sub> | B <sub>2</sub> | T <sub>1</sub> | T <sub>2</sub> |
|---|-----------------------|----------------|----------------|----------------|----------------|----------------|----------------|
| N | $\Delta E_{ads}$ (eV) | -7.38          | -7.15          | -7.61          | -7.38          | 109.77         | -7.38          |
|   | CT (e)                | 0.11           | 0.11           | 0.11           | 0.11           | 0.49           | 0.11           |
| O | $\Delta E_{ads}$ (eV) | -48.43         | -53.27         | -53.27         | -53.27         | -3.46          | -53.27         |
|   | CT (e)                | 0.96           | 0.97           | 0.97           | 0.97           | 0.03           | 0.97           |

**Table S2.** The molecular energies, Zero-point energy (ZPE), entropic corrections ( $T\Delta S$ ) to the free energies and ( $ZPE - T\Delta S$ ) values of the gas-phase. The Zero-point energy (ZPE) and entropic corrections ( $T\Delta S$ ) at  $T = 298.15$  K to the free energies values were taken from NIST-JANAF

thermodynamic table.

|                  | N <sub>2</sub> | N <sub>2</sub> O | CO      | CO <sub>2</sub> |
|------------------|----------------|------------------|---------|-----------------|
| E (eV)           | -383.49        | -493.48          | -340.83 | -529.23         |
| $\Delta G$ (eV)  | -16.20         | -20.95           | -14.24  | -22.61          |
| ZPE (ev)         | 3.46           | 6.91             | 3.23    | 7.15            |
| $T\Delta S$ (eV) | 13.37          | 17.06            | 15.45   | 14.99           |

**Table S3.** The Gibbs free energies of the adsorbed species at  $T = 298.15$  K. The Zero-point energy (ZPE) and entropic corrections ( $T\Delta S$ ).

| E-R                    | Cu     | Co     | Ni     | Zn     | Ru      | Rh      | Pd      | Pt     |
|------------------------|--------|--------|--------|--------|---------|---------|---------|--------|
| $\Delta GN_2O$<br>(eV) | -52.12 | -51.19 | -47.04 | -51.42 | -50.96  | -51.65  | -71.49  | -58.80 |
| $\Delta GCO$ (eV)      | -31.13 | -32.28 | -36.43 | -32.05 | -32.28  | -31.59  | -11.99  | -24.44 |
| L-H                    | Cu     | Co     | Ni     | Zn     | Ru      | Rh      | Pd      | Pt     |
| $\Delta GN_2O$<br>(eV) | -88.32 | -93.16 | -89.01 | -92.70 | -102.37 | -100.31 | -113.46 | -90.16 |
| $\Delta GCO$ (eV)      | 2.77   | 7.84   | 4.38   | 6.92   | 4.84    | 8.30    | 9.69    | 4.84   |
